# Supplementary material for: Cytotoxic Potential of the Monoterpene Isoespintanol against Human Tumor Cell Lines
Source: MDPI journal article supplement (doi:10.3390/ijms25094614), 2024-04-23
Supplement: s1 [file s1]

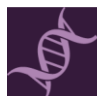

Article

# Cytotoxic Potential of the Monoterpene Isoespintanol Against Human Tumor Cell Lines

Orfa Inés Contreras Martínez<sup>1</sup>, Alberto Angulo Ortiz<sup>2\*</sup>, Gilmar Santafé Patiño<sup>2</sup>, Fillipe Vieira Rocha<sup>3</sup>, Karine Zanotti<sup>3</sup>, Dario Batista Fortaleza<sup>3</sup>, Tamara Teixeira<sup>3</sup> and Jesús Sierra Martínez<sup>4</sup>

<sup>1</sup> Biology Department, Faculty of Basic Sciences, University of Córdoba, Montería 230002, Colombia.

<sup>2</sup> Chemistry Department, Faculty of Basic Sciences, University of Córdoba, Montería 230002, Colombia.

<sup>3</sup> Chemistry Department, Federal University of São Carlos, São Carlos, SP CEP 13565-905, Brazil.

<sup>4</sup> Genetics and Evolution Department, Federal University of São Carlos, São Carlos, 13565-905, SP, Brazil.

## Supplementary Materials

**Table S1.** *IC<sub>50</sub> values of cisplatin on MDA-MB-231, A549, DU145, A2780, A2780-cis and MRC5 monolayers.*

| Cell lines | IC <sub>50</sub> cisplatin (μM) |
|------------|---------------------------------|
| MDA-MB-231 | 2.40 ± 0.21                     |
| A549       | 14.40 ± 1.40                    |
| DU145      | 2.30 ± 0.42                     |
| A2780-cis  | 25.61 ± 0.29                    |
| A2780      | 11.17 ± 0.30                    |
| MRC5       | 12.47 ± 0.15                    |
